**Title:**

**Biomass increase under zinc deficiency caused by delay of early flowering in *Arabidopsis***

**Authors:**

**Xiaochao Chen and Uwe Ludewig**

**Affiliation:**

Institute of Crop Science, Nutritional Crop Physiology, University of Hohenheim, Fruwirthstr. 20, 70593 Stuttgart, Germany

**Contact information:**

Prof. U. Ludewig, Tel.: +49 (0) 711 - 459 22344, Fax.: +49 (0) 711 - 459 23295, e-mail: [u.ludewig@uni-hohenheim.de](mailto:u.ludewig@uni-hohenheim.de)

[xiaochao.chen@uni-hohenheim.de](mailto:xiaochao.chen@uni-hohenheim.de)

**Running title:**

Zn-dependence of leaf size and flowering

**Highlight:**

An increase in biomass of some *Arabidopsis* accessions under Zn-deficiency is caused by retardation of flowering, prolonging vegetative growth.

1

## 2 **Abstract**

3 Plants generally produce more biomass when all nutrients are available in sufficient  
4 amounts. In addition to environmental constraints, genetic and developmental factors,  
5 such as the transition from vegetative to reproductive growth, restrict maximal yield.  
6 Here we report the peculiar observation that a subset of early flowering *Arabidopsis*  
7 *thaliana* accessions produced larger shoot rosette diameters when grown in zinc  
8 (Zn)-deficient conditions, compared with Zn-sufficient conditions. This was  
9 associated with early flowering that restricted the leaf length under Zn sufficiency.  
10 Zinc deficiency repressed *FLOWERING LOCUS T (FT)* expression, a major regulator  
11 of flowering. Repression or loss of *FT* increased the rosette diameter by a delay of  
12 the transition to flowering, a longer phase of leaf proliferation and increased leaf  
13 number. The transition to flowering reduced, but not terminated, the proliferation of  
14 established leaves. The size of individual leaf mesophyll cells was not affected by Zn  
15 deficiency or loss of *FT*, indicating that the larger rosette diameter was caused by  
16 maintained proliferation of vegetative tissue. As a consequence, early flowering  
17 accessions under Zn deficiency grew larger rosette diameters due to a delay of  
18 flowering, which explains the unusual increase of vegetative biomass under nutrient  
19 deficiency.

20

## 21 **Keywords:**

22 micronutrient, rosette diameter, cell proliferation, natural variation, nutrition, leaf  
23 length, vegetative growth

## 24 **Abbreviations:**

25 DAS: days after sowing, GWA: genome-wide association, SNP: single nucleotide  
26 polymorphism, Zn: zinc.

27

## 28 **Introduction**

29 Zinc (Zn) is an essential micronutrient for plants and humans. It is a structural  
30 component of many catalytic enzymes and transcription factors, so that specific  
31 diseases are associated with its deficiency (Broadley *et al.*, 2007; Chasapis *et al.*,  
32 2012; Marschner, 2011). The Zn bio-availability in many natural soils and crop

33 production systems is low, often as a result of high CaCO<sub>3</sub> content and alkaline soil  
34 pH. As a consequence, many food products are low in Zn, causing malnutrition in  
35 humans (Cakmak, 2008).

36 In *Arabidopsis*, over 2000 Zn-related genes are annotated, primarily with catalytic  
37 and transcriptional regulator activities (Broadley *et al.*, 2007). Zn-responsive key  
38 genes and transporters involved in Zn uptake and translocation have been reported  
39 using molecular and genetic tools (Sinclair and Kramer, 2012). Severe Zn deficiency  
40 leads to reduced, abnormal leaf and seed growth, in addition to impaired flower  
41 development (Talukdar and Aarts, 2007). Generally, plant development and flowering  
42 can be delayed when a certain nutrient is unavailable to the plant, but general  
43 nutrient deficiency in *Arabidopsis* has been associated with acceleration of flowering  
44 (Kolar and Senkova, 2008). In the ornamental plant *Pharbitis nil*, poor nutrition  
45 promotes flowering and this is correlated with elevated expression of the major  
46 flowering integrator *FLOWERING LOCUS T (FT)* (Wada *et al.*, 2010).

47 The appropriate decision for flowering in annual plants is crucial for their lifespan  
48 and is under very complex genetic control, with over 360 genes implicated (Andres  
49 and Coupland, 2012; Bouche *et al.*, 2016). The transition to flowering depends on  
50 several endogenous and environmental signals, which are best studied in  
51 *Arabidopsis thaliana*. Several flowering pathways have been identified, such as  
52 photoperiod, temperature, vernalization, gibberellin and sugar pathways (Andres and  
53 Coupland, 2012; Bouche *et al.*, 2016; Capovilla *et al.*, 2015). Flowering signals  
54 converge in the activation of the *FT* gene in source leaves. Its translated gene  
55 product (florigen) is phloem mobile and is translocated to the shoot apical meristem,  
56 where *FT* dimerizes with the transcription factor *FLOWERING LOCUS D (FD)* to  
57 activate another central integrator, *SUPPRESSOR OF OVEREXPRESSION OF*  
58 *CONSTANS 1 (SOC1)*. This terminates the vegetative fate of the apical meristem  
59 and initiates flower development (Corbesier *et al.*, 2007; Jaeger and Wigge, 2007;  
60 Notaguchi *et al.*, 2008). While the transition to the flowering fate in the apical  
61 meristem is well explained by *FT* (Amasino, 2010; Andres and Coupland, 2012), its  
62 role in the regulation and termination of vegetative leaf growth is less well understood  
63 (Melzer *et al.*, 2008; Shalit *et al.*, 2009). In already established leaves, the final leaf  
64 size and the rosette diameter are ultimately controlled by the complex coordination of  
65 primordium size, cell proliferation and cell expansion (Gonzalez *et al.*, 2012; Powell  
66 and Lenhard, 2012). The maintenance of vital meristematic regions in leaves is

67 essential to obtain maximal leaf growth and size (Gonzalez *et al.*, 2012; Powell and  
68 Lenhard, 2012).

69 In preliminary experiments we initially observed that in a Zn-deficient soil-sand  
70 mixture, some *Arabidopsis* plants finally produced more shoot biomass than in a Zn-  
71 sufficient soil. To uncover the genetic basis for this unusual behavior, we grew 168  
72 *Arabidopsis* accessions in low Zn and Zn-amended soil-sand mixtures and quantified  
73 the rosette diameters of these accessions as a proxy for shoot size and leaf growth  
74 (length). Unexpectedly, Zn deficiency prolonged vegetative growth in some early-  
75 flowering accessions, leading to larger plants, an effect potentially genetically  
76 associated with *FT*. Loss-of-function mutants of flowering genes also differed in their  
77 rosette size in a Zn-dependent manner. While it is well accepted that the transition to  
78 flowering in the shoot apical meristems ultimately terminates further vegetative  
79 growth, our results uncover that FT only gradually represses already established  
80 vegetative leaves, at least in a subpopulation of *Arabidopsis*.

81

## 82 **Results**

### 83 **Natural variation of rosette diameter and its response to zinc deficiency**

84 To explore the natural variation and differential plant growth as the function of  
85 differential Zn availability in soil, 168 *Arabidopsis thaliana* accessions were grown in  
86 a fertilized soil-sand mix without (-Zn) or with added ZnSO<sub>4</sub> (+Zn) in the greenhouse.  
87 The set of accessions included six main populations (Central Europe, Northern  
88 Europe, Iberian Peninsula, Mediterranean, Central Asia and North America) and  
89 three small populations (Cape Verde, Canary Islands and Japan) (Supplemental  
90 Figure S1, Supplemental Table 1) (Chen *et al.*, 2016; Stetter *et al.*, 2015).

91 There was substantial natural variation in the vegetative shoot growth and rosette  
92 diameter among these accessions in +Zn and -Zn, which represented Zn sufficiency  
93 and mild Zn deficiency conditions, respectively (Figure 1A). The rosette diameter, a  
94 proxy for the maximal vegetative leaf length (with petiole), ranged from 1.3 cm to  
95 12.6 cm in +Zn, with a major distribution peak of around 10 cm. In -Zn, the rosette  
96 diameter ranged from 2.3 cm to 9.6 cm, with the majority of accessions having a  
97 rosette of around 7 cm (Figure 1A; Supplemental Table S2). One-way ANOVA  
98 indicated that significant genetic differences were observed among accessions  
99 ( $p < 2e-16$ ), in both conditions (Supplemental Table S3). Broad-sense heritability of

100 rosette diameter was 0.69 for +Zn, but only 0.38 for -Zn (Supplemental Table S3). As  
101 expected, the rosette diameter in -Zn highly correlated with that in +Zn ( $p < 2.5e-8$ ,  
102 Supplemental Figure S2), as the leaf size is principally genetically controlled.  
103 Interestingly, the data suggest that the 168 accessions adjust their growth differently  
104 depending on Zn availability. Most accessions produced smaller final rosette  
105 diameters under -Zn, as expected when an essential nutrient is limiting for leaf  
106 growth. However, the others ended up with larger rosette diameters under -Zn  
107 (Figure 1A-B). These accessions included the widely used accession Col-0.

108 To quantify this interesting phenomenon, we defined the relative reduction of the  
109 rosette diameter due to Zn deficiency as  $[(+Zn) - (-Zn)] * 100 / +Zn$  and called this  
110 number “Zn effect” on the final rosette diameter. This “Zn effect” is positive for plants  
111 with increased rosette diameter in Zn-amended soil. A positive “Zn effect” thus  
112 represents the situation in which higher availability of an essential nutrient increases  
113 the final plant size, likely because this element was growth limiting. However, the Zn  
114 effect is negative for plants with larger rosette diameter in Zn-deficient soil. This  
115 negative “Zn effect” thus represents a situation in which other factors than missing Zn  
116 limited further growth. 126 accessions (67% of 168 accessions, e.g. Sf-2) had  
117 decreased rosette diameter in Zn-deficient soil (Figure 1C, positive Zn effect on leaf  
118 size). By contrast, the other 42 accessions (33% of 168 accessions, e.g. Col-0) had a  
119 decreased rosette diameter, despite having sufficient Zn in soil (Figure 1C, negative  
120 Zn effect). The average Zn effect was -64.5% for the negative responses and 24.8%  
121 for the positive responses. The Zn effect was determined by +Zn soil ( $r = 0.85$ ,  
122  $p < 2.2e-16$ ), rather than -Zn soil ( $r = 0.06$ ,  $p = 0.4478$ , Supplemental Figure S2),  
123 indicating that the Zn effect was not primarily due to different growth and  
124 development under Zn deficiency. Rather, strong heterogeneity of growth and  
125 flowering time in the population was observed in +Zn and this heterogeneity was lost  
126 in -Zn.

127

## 128 **Genome-wide association mapping for the Zn effect**

129 To identify the underlying genetics of the Zn effect on rosette diameter, we carried  
130 out genome-wide association (GWA) mapping with 162 accessions for which high  
131 density single nucleotide polymorphisms (SNPs) were available. A multi-locus mixed  
132 model was implemented to eliminate noise of population structure (Segura *et al.*,

133 2012). A stringent p-value cutoff with 5% false discovery rate (FDR) was set to  
134 quantify the significance.

135 The GWA did not identify any significant SNP for the rosette diameter under both  
136 +Zn and -Zn conditions (data not shown). However, four significant candidate SNPs  
137 were observed for the Zn effect: *Chr1\_16581335*, *Chr1\_23946852*, *Chr1\_24341704*  
138 and *Chr4\_11742318* (Figure 2; Supplemental Figure S3 & S4). Although none of  
139 these loci qualified for a distinguished high quality candidate locus with numerous co-  
140 segregated SNPs, we noted that the 48 transcripts located +/- 20 kb of these four  
141 SNPs were enriched in genes annotated as being involved in flowering or were  
142 overrepresented in being expressed during reproduction (Supplemental Table 4).  
143 *AT1G43800* (*FTM1*, *FLORAL TRANSITION AT THE MERISTEM1*) and *AT1G65480*  
144 (*FT*, *FLOWERING LOCUS T*) locate 535 bp and 7770 bp distant of the significant  
145 SNPs *Chr1\_16581335* and *Chr1\_24341704*, respectively. *FTM1* is activated  
146 independently of *FLOWERING LOCUS T* (*FT*) and *SUPPRESSOR OF*  
147 *OVEREXPRESSION OF CONSTANS1* (*SOC1*) during the floral induction (Torti *et al.*,  
148 2012). *FT* is central to flowering and the allele G at *Chr1\_24341704* in the vicinity of  
149 *FT* was associated with the negative Zn effect (Supplemental Figure S4). It was less  
150 frequently represented in the population than the allele A.

151

## 152 **Relationship of rosette diameter with flowering and Zn**

153 As flowering genes were identified as potential candidates in the GWA, we assumed  
154 that flowering time is potentially correlated with the final rosette diameter, two traits  
155 with typically minor correlation (Atwell *et al.*, 2010). Indeed, flowering time was highly  
156 correlated with the rosette diameter in negative-response accessions, which flowered  
157 typically earlier (Figure 3A). However, no significant correlation with flowering was  
158 found in the accessions with positive Zn effect. Moreover, we examined how the  
159 central flowering integrator *FT* was affected by Zn via measuring its expression level,  
160 including four negative-response accessions (Col-0, Po-0, Ct-1, No-0) and four  
161 positive-response accessions (Lerik1-3, Koz-2, Sf-2, Cvi-0). RNA was extracted at 14  
162 DAS (days after sowing), when the plants were still in vegetative growth. -Zn greatly  
163 reduced *FT* expression in all accessions (Figure 3B). In addition, negative-response  
164 accessions presented higher *FT* level compared to positive-response accessions, in  
165 agreement with early flowering and *FT* involved in the Zn effect. The same gene

166 expression pattern was observed for another central floral integrator, *SOC1*  
167 (Supplemental Figure S5).

168

### 169 **Genetics of early flowering, rosette size and relation with Zn**

170 The phenotypic differences within a batch of Col-0 plants are shown in Figure 4A;  
171 obviously, -Zn repressed and delayed flowering. Further genetic analysis  
172 concentrated on this negative-response accession (Zn effect was -119 %), with  
173 strong *FT* and *SOC1* inhibition by -Zn (Fig. 4B). To get more insight whether  
174 photoperiod, sugar, vernalization, gibberellin or ambient temperature pathways were  
175 affected by Zn availability (Andres and Coupland, 2012), we checked the expression  
176 of key genes representative of these flowering pathways during vegetative growth.  
177 The expression of the diurnal integrator *CONSTANS (CO)* and the trehalose  
178 biosynthesis enzyme *TREHALOSE-6-PHOSPHATASE SYNTHASE 1 (TPS1)* was  
179 not different. Furthermore, the transcriptional repressors *FLOWERING LOCUS C*  
180 (*FLC*), *FLOWERING LOCUS M (FLM)* and *SHORT VEGETATIVE PHASE (SVP)*,  
181 the latter two being inhibitors of the elevated temperature-induced early flowering  
182 pathway, were all unaffected by Zn. Finally, the flowering promoting *GIBBERELLIN*  
183 *3-OXIDASE1 (GA4)*, as well as the expression of *FTM1*, identified from the GWA,  
184 were also not different between -Zn and +Zn (Fig. 4B).

185 Next we tested how mutant null alleles of key flowering genes in the Col-0  
186 background responded to different Zn availability, including *ft-10*, *soc-1-2* and *flc-3*.  
187 Since early flowering appeared to be sensitive to Zn, we also included mutants in the  
188 elevated temperature-induced early flowering pathway, *flm-3* and *svp-32*  
189 (Balasubramanian *et al.*, 2006; Pose *et al.*, 2013). The shoot Zn concentrations for all  
190 these mutants, its corresponding wild type Col-0 and the accession Sf-2 were below  
191 20 µg/g, a typical deficiency threshold in many plant species. Shoot Zn massively  
192 differed between -Zn and +Zn conditions (Figure 4C). Furthermore, typical Zn-  
193 deficiency responsive genes, such as the Zn transporter genes *ZIP1*, *ZIP4*, *ZIP5* and  
194 *IRT3*, were induced under -Zn conditions in both Col-0 and Sf-2, indicating the  
195 activation of known physiological Zn-deficiency responses (Supplemental Figure S6).  
196 The flowering time was quantified at bolting stage by counting rosette leaf numbers  
197 rather than growth days, to eliminate the influence of growth speed  
198 (Balasubramanian *et al.*, 2006; Pose *et al.*, 2013). In agreement with previous studies,

199 *ft-10* and *soc-1* had delayed flowering time, whereas *svp-32* and *flm-3/svp-32*  
200 accelerated flowering (Figure 4D). Meanwhile, *flc-3* and *flm-3* had similar flowering  
201 time as Col-0, which is likely explained by the weak *FLC* and *FLM* alleles in the  
202 accession Col-0 (Balasubramanian *et al.*, 2006; Lempe *et al.*, 2005). Nevertheless,  
203 Zn deficiency delayed flowering in all genotypes by a few days, irrespective of their  
204 widely different overall flowering time (Figure 4D). Interestingly, synchronously with  
205 this delay of flowering in  $-Zn$ , the rosette diameter of all genotypes increased  
206 significantly, except for *ft-10*, where only a minor trend, but no significant increase in  
207 rosette diameter was observed (Figure 4E). The larger rosette diameter of Col-0 in  $-$   
208 Zn, as well as the increased number of leaves due to longer vegetative growth finally  
209 translated into larger total vegetative biomass, as compared with the Zn-amended  
210 control condition. The same was true for *svp-32*, while the final vegetative biomass of  
211 *ft-10* and *soc-1* did not differ between  $-Zn$  and  $+Zn$  (Figure 4F).

212

### 213 **Manipulation of the zinc effect by growth temperature or vernalization in two** 214 **genetic backgrounds**

215 To further get mechanistic insight into the Zn effect, we next asked whether the Zn  
216 effect could be eliminated or induced by environmental manipulation of the flowering  
217 time. Therefore, the early flowering accession Col-0 and the late-flowering accession  
218 Sf-2 were either grown at low temperature (16°C, Col-0) or were vernalization pre-  
219 treated before growth at 23°C, to promote flowering (Sf-2), respectively. Because of  
220 the causal roles of *FT* and *SOC1* genes in regulating flowering, their expression in  
221 the various conditions was monitored. Expression was strongly reduced by Zn  
222 deficiency after 2 weeks, irrespective of the growth temperature in Col-0 (Figure 5 A-  
223 B). However, this difference in gene expression did not remain after 7 weeks at 16°C,  
224 when plants still were in vegetative stage (Figure 5 C). Similarly, in Sf-2, the reduced  
225 expression of *FT* and *SOC1* in  $-Zn$  was stronger at 2 weeks, but only a minor *FT*  
226 expression difference was apparent after 7 weeks of vegetative growth (Figure 5 D-  
227 F). In agreement with this gene expression pattern, Col-0 flowered after 3 weeks at  
228 23°C, but flowering time was delayed to over 7 weeks at 16°C. Interestingly, the  
229 delay of flowering in  $-Zn$  was entirely lost at 16°C, leading to equal rosette diameters  
230 in  $-Zn$  and  $+Zn$  conditions (Figure 5G-H). Furthermore, the rosette diameter of Col-0  
231 plants grown in  $+Zn$  was larger at 16°C compared to 23°C, because flowering



232 terminated the vegetative growth in plants grown at the higher temperature. On the  
233 other hand, vernalization of Sf-2 was able to accelerate flowering time to 3 weeks,  
234 although without vernalization, this accession flowered only later than 7 weeks.  
235 Accordingly, the flowering time and rosette diameter of non-vernalized Sf-2 were  
236 indistinguishable between different Zn supplies (Figure 5G-H). By contrast, the early  
237 flowering of vernalized Sf-2 was delayed in  $-Zn$  and, consequently, the rosette  
238 diameter was slightly increased in  $-Zn$ . Although all Sf-2 plants (vernalized and non-  
239 vernalized) were grown at 23°C, the vernalized plants finally had smaller rosette  
240 diameters, because they flowered earlier (Figure 5G-H).

241

### 242 **Leaf cell proliferation contributed to the differences in leaf length**

243 The final leaf length (and rosette diameter) are ultimately controlled by the complex  
244 coordination of leaf primordium size, differential cell proliferation in different areas of  
245 the leaf and cell expansion (Gonzalez *et al.*, 2012; Powell and Lenhard, 2012). To  
246 get insight into the underlying mechanism behind the increased final leaf length in  $-$   
247 Zn (Figure 6A), the leaf mesophyll cell size and cell numbers were microscopically  
248 quantified at two stages, 19 DAS and 33 DAS, using confocal imaging (Figure 6B).  
249 Plants in  $-Zn$  and  $+Zn$  conditions did not flower at 19 DAS, but fully flowered at 33  
250 DAS. The late flowering *ft-10* mutant was also analysed. Interestingly, the cell size  
251 was not distinguishable at 19 DAS for Col-0 or at 33 DAS in Col-0 and *ft-10*,  
252 irrespective whether grown in  $-Zn$  or  $+Zn$  (Figure 6C). Since Col-0 leaves differed in  
253 size at 33 DAS depending on Zn (and differed from *ft-10*, Figure 6A), this indicated  
254 that the cell number differences (and thus cell proliferation in established leaves)  
255 mainly contributed to the differences in the leaf length.

256

### 257 **Gradual repression of leaf growth rate via zinc-promoted flowering**

258 The transition of vegetative to reproductive growth by the induction of flowering is  
259 commonly centred to the apical shoot meristem, but how the growth of already  
260 established leaves is also finally terminated and ends in senescence, is little  
261 investigated. In order to quantify the onset of leaf growth rate inhibition by Zn and FT,  
262 we documented the growth curve of the rosette diameter, as well as the petiole  
263 length in Col-0 and *ft-10* plants. The rosette diameters were initially indistinguishable  
264 between  $+Zn$  and  $-Zn$ , in agreement with the assumption that the essential Zn was

265 not growth limiting at this stage. However, the rosette diameter differed just after the  
266 transition to flowering in the apical meristem had occurred (Figure 7A), consistent  
267 with an immediate repressing signal transmitted at the time of flower initiation in +Zn  
268 (21 DAS, Figure 7A). Interestingly, the longitudinal leaf growth rate was not  
269 terminated, but only reduced, after the transition to flowering. The longitudinal leaf  
270 growth rate in -Zn remained larger than in +Zn, until termination at around 33 DAS  
271 (Figure 7A). Such a repression of leaf growth was lost in *ft-10*, which did not flower  
272 before 32 DAS, leading to strong leaf expansion irrespective of Zn supply (Figure  
273 7B). The petiole elongation showed a similar pattern as the entire rosette diameter in  
274 the response to Zn deficiency, suggesting a similar restriction mechanism in the  
275 petiole and in the leaf blade (Figure 7 A-B).

276

## 277 **Discussion**

278 Substantial natural variation has been previously reported in *Arabidopsis thaliana*,  
279 including rosette diameter, leaf shape, ion content, flowering time and many other  
280 physiological characteristics (Salt *et al.*, 2008; Weigel, 2012). However, only limited  
281 knowledge has been obtained to understand how the natural variation growth  
282 phenotypes are influenced by nutrient deficiency. Here, we investigated the rosette  
283 diameter of 168 *Arabidopsis* accessions grown in +Zn (control) and -Zn (Zn  
284 deficiency) soil-sand mixes. Randomly chosen plants grown on the Zn-deficient soil-  
285 sand mix had only Zn concentrations of ~10-13 µg/g in their shoot tissue, but did not  
286 show visual signs of Zn deficiency. As expected, the rosette diameter was highly  
287 variable among these 168 accessions in both conditions (Figure 1). Surprisingly, not  
288 all accessions reduced their rosette diameters in -Zn, which was inconsistent with  
289 our naive expectation that plants must grow better and produce more biomass when  
290 all essential nutrients are adequately supplied (Marschner, 2011). To mechanistically  
291 unravel this interesting finding, we quantified the “Zn effect” by calculating the relative  
292 difference in rosette diameter, to indicate how different accessions respond to Zn  
293 deficiency. The 168 accessions were divided into 126 positive Zn effect accessions  
294 (e.g. Sf-2) and 42 negative accessions (e.g. Col-0). In the positive Zn effect  
295 accessions the addition of Zn increased the plant diameter, which is expected if an  
296 essential nutrient is growth limiting. However, larger rosette diameters in -Zn were

297 found in the negative Zn effect accessions, compared to +Zn conditions, suggesting  
298 that other factors apart from missing Zn reduced the growth.

299 We performed multi-locus mixed model genome-wide association (GWA) mapping  
300 for the Zn effect (Figure 2). Although four significant SNPs were associated with the  
301 Zn effect, of which two were close to flowering genes *FT* and *FTM1*, none of these  
302 loci qualified for a convincing, strong hit with multiple linked co-segregated significant  
303 SNPs in the vicinity ~20 kb, which are expected for causal loci. However, any  
304 significant SNP hit may deserve further analysis, although a larger population is likely  
305 required to further validate the candidate SNPs identified. The suggested link to  
306 flowering potentially indicated that we unintentionally screened for flowering  
307 differences in the population, as flowering was indeed affected by Zn. In earlier  
308 population studies with *Arabidopsis*, the flowering time and rosette diameter had only  
309 minor correlation (Atwell *et al.*, 2010). Here, surprisingly, we found a strong positive  
310 correlation between flowering time and rosette diameter, but only in the 42 negative-  
311 response, early flowering accessions (Figure 3). No significant correlation was found  
312 in the 126 positive-response accessions. Under the conditions used, early flowering  
313 was prominent in +Zn, but lost in -Zn. Late flowering accessions probably maintained  
314 a longer vegetative growth phase and leaves were already fully expanded before  
315 flowering, but it is worth to note that some among the negative Zn effect accessions  
316 also flowered very early. This potential connection of Zn with flowering was analysed  
317 in more detail. *FTM1* expression was unchanged by Zn supply, but the *FT* expression  
318 was generally repressed under Zn deficiency (Figure 3 & 4).

319 In several key mutants in the Col-0 background that are affected in (early)  
320 flowering, Zn consistently delayed flowering, in agreement with the observations in  
321 natural accessions with different flowering time. This indicated a strong genetic  
322 connection with flowering time, but failed to identify all convincing causal targets of  
323 the Zn effect. General poor nutrient supply had been shown to accelerate flowering in  
324 *Arabidopsis* (Kolar and Senkova, 2008). The macronutrients nitrate and phosphate  
325 act in an antagonistic way, as nitrate deficiency promotes and low phosphate delays  
326 flowering (Kant *et al.*, 2011). At higher concentrations, nitrate promotes flowering  
327 independent of the phytohormone gibberellin, which integrates several environmental  
328 stimuli and acts downstream of other known floral induction pathways (Castro Marin  
329 *et al.*, 2011). Thus, the effects of nutrient deficiencies on flowering are not uniform.  
330 Flowering is also promoted by mineral stress (50  $\mu$ M cadmium, toxic for *Arabidopsis*)

331 via up-regulation of *CONSTANS* (*CO*) and *FT* (Wang *et al.*, 2012). Zn deficiency  
332 generally repressed *FT* expression, even in late flowering accessions and delayed  
333 flowering in some genotypes. Interestingly, Zn deficiency consistently led to larger  
334 rosette diameters in negative Zn effect accessions. Because of the prolonged  
335 vegetative growth time, longer and more leaves were established, so that –Zn grown  
336 plants finally accumulated more vegetative biomass than +Zn-grown plants (Figure 4).  
337 The canonical flowering pathways, such as photoperiod, temperature, vernalization,  
338 sugar and gibberellins, were apparently unaffected by Zn (Figure 4). The reduced  
339 expression of *SOC1* in –Zn could be just a consequence of *FT* repression, as *SOC1*  
340 is a downstream gene of *FT* (Andres and Coupland, 2012). Plants lacking *FT*  
341 flowered later than *soc-1-2* and produced larger rosettes, confirming that *FT* is the  
342 central floral integrator. Consequently, Zn also regulated flowering time and rosette  
343 diameter in *soc-1-2* plants. The direct target of the Zn effect, however, remains  
344 unclear, as flowering was even delayed in the very late flowering *ft-10* in –Zn. Some  
345 further regulator of *FT* expression might be Zn-dependent. It is noted, however, that  
346 the small difference between *ft-10* large rosette diameters in +Zn and –Zn was not  
347 significant, suggesting that the Zn effect was largely lost in this mutant and that a  
348 SNP close to the *FT* gene was genetically associated with the Zn effect.

349 While our data suggest that *FT* expression can be delayed in –Zn, there is likely  
350 also a “memory” effect induced under different Zn supply, as in individual, genetically  
351 identical Sf-2 plants grown under identical conditions, the Zn effect could be  
352 introduced by vernalization pre-treatment (Figure 5). Indeed, *FT* expression is  
353 epigenetically controlled (Andres and Coupland, 2012). In late-flowering plants, many  
354 other factors apart from *FT* regulate flowering time and restrict organ size, including  
355 genes involved in auxin, cytokinin and gibberellin signaling (Bogre *et al.*, 2008;  
356 Powell and Lenhard, 2012). The target of *FT* to terminally restrict vegetative leaf  
357 growth is, however, unlikely the shoot apical meristem alone, as suggested by the  
358 leaf cell numbers and rosette growth curves of Col-0 and *ft-10* plants (Figure 6 & 7).  
359 The rosette diameters were initially indistinguishable between +Zn and –Zn (Figure  
360 7), but differed after flowering, indicating that a repressing signal was received in  
361 already fully established, 1 cm long rosette leaves in +Zn (21 DAS). This repressing  
362 signal could be *FT* itself or a downstream signal, but importantly, the inhibition of cell  
363 proliferation that results in less leaf cell numbers in +Zn, was entirely lost in *ft-10*,  
364 which is known to have a much larger rosette diameter (Figure 6).

365 A schematic working model summarizes the dual effects of *FT* in flowering and  
366 leaf length restriction (Figure 7C). -Zn repressed *FT* expression in certain early  
367 flowering genotypes via an unknown and potentially indirect process, leading to  
368 delayed flowering compared to +Zn plants. As a consequence, plants in Zn  
369 deficiency produced more and longer leaves via prolongation of vegetative growth.  
370 This Zn effect, however, is only found in a subset of the *Arabidopsis* population,  
371 namely in early flowering genotypes, and is clearly different from general nutrient  
372 deficiencies, which promote flowering. From an ecological perspective, the two  
373 strategies to respond to limited Zn may be beneficial in different environments.  
374 Restricting further vegetative growth after abiotic stress-induced early flowering, as  
375 observed in the negatively Zn-responsive genotypes, will lead to early, but few  
376 seeds, while the delay of flowering under -Zn will prolong the vegetation period,  
377 increase accumulation of nutrients, that finally are transferred to many, but late  
378 seeds. Whether this nutritional regulation of flowering and the concomitant restriction  
379 of vegetative growth are relevant in ecosystems and crops, are interesting questions  
380 for future research.

381

## 382 **Methods**

### 383 **Plant material, soil-sand preparation and growth conditions**

384 168 *Arabidopsis thaliana* accessions used in this study are listed in the Supplemental  
385 Table S1. Seeds for all accessions were obtained from Dr. Karl Schmid (Germany).  
386 The *ft-10*, *soc1-2*, *flc-3*, *flm-3*, *svp-32*, *flm-3/svp-32* mutants in the Col-0 background  
387 were gifted by Dr. Markus Schmid (Umea, Sweden). All accessions and mutants  
388 have been previously described (Balasubramanian *et al.*, 2006; Pose *et al.*, 2013;  
389 Stetter *et al.*, 2015).

390 Soil-sand mixtures of a Zn-scarce soil from a C-horizon of a loess soil (0.7 mg kg<sup>-1</sup>  
391 Zn, pH 7.2) was mixed at 1:1 ratio with quartz sand (0.6-1.2 mm diameter), which  
392 was washed with HCl (rinsed with tap water, pH<1 adjusted with HCl, incubated for  
393 one day, rinsed with deionized water to pH>5) to wash out trace nutrients, biological  
394 contaminations and dust. The soil-sand mix was fertilized with 1.1 g kg<sup>-1</sup> NH<sub>4</sub>NO<sub>3</sub>, 0.9  
395 g kg<sup>-1</sup> K<sub>2</sub>SO<sub>4</sub>, 2.1 g kg<sup>-1</sup> MgSO<sub>4</sub> and 1.6 g kg<sup>-1</sup> Ca(H<sub>2</sub>PO<sub>4</sub>)<sub>2</sub>. 200 g of soil-sand per  
396 plant (or 120 g for qRT-PCR experiments and mutant experiments) was placed in the  
397 pots before watering with 7-8 ml micronutrients, according to a modified Hoagland's  
398 solution (1 mM NH<sub>4</sub>NO<sub>3</sub>, 1 mM KH<sub>2</sub>PO<sub>4</sub>, 0.5 mM MgSO<sub>4</sub>, 1 mM CaCl<sub>2</sub>, 0.1 mM  
399 Na<sub>2</sub>EDTA-Fe, 2 μM ZnSO<sub>4</sub>, 9 μM MnSO<sub>4</sub>, 0.32 μM CuSO<sub>4</sub>, 46 μM H<sub>3</sub>BO<sub>3</sub>, 0.016 μM  
400 Na<sub>2</sub>MoO<sub>4</sub>). In addition, 3 mg kg<sup>-1</sup> ZnSO<sub>4</sub> was added into soil for the control treatment  
401 (+Zn).

402 Seeds were stratified at 4°C for 3 days to promote germination. Plants were  
403 cultivated in greenhouse (GWA, during a warm period in May 2013) or in controlled  
404 growth chambers (all other experiments). The growth conditions were generally set  
405 as: long days (16h light/ 8h dark), 23°C light / 20°C dark, 120-140 μmol m<sup>-2</sup> s<sup>-1</sup> and  
406 65% humidity , or 16°C light / 16°C dark for ambient temperature experiment.

407 Vernalization treatment was 3 weeks at 4°C.

408

### 409 **Phenotype scoring**

410 For the genome-wide association (GWA), six randomized replicates per accession  
411 were analyzed. For each plant, the rosette diameter was measured from a pair of  
412 diameters of four biggest leaves, after six weeks of growth. For the flowering time  
413 quantification, 3 replicates were recorded for each accession. The flowering time was

414 quantified as the growth days required for a 1 cm visible bolt and leaf number at  
415 bolting stage. 100 days were set as the flowering time for the ultimate non-flowering  
416 accessions. In mutant experiments, 5-17 plants were analyzed at bolting stage (1 cm  
417 visible bolt) for rosette diameter, leaf number and flowering days as previously  
418 described (Lempe *et al.*, 2005; Salome *et al.*, 2011). The Zn effect was calculated as:  
419  $(\text{plus Zn} - \text{minus Zn}) / \text{plus Zn} \times 100$ .

420

#### 421 **Genome-wide association (GWA)**

422 GWA was conducted using the multi-locus mixed-model to overcome the influence of  
423 population structure (Segura *et al.*, 2012) with previously determined kinship matrix  
424 and SNP data from either fully sequenced genotypes or microarray analysis (Stetter  
425 *et al.*, 2015). Only 162 accessions were used in GWA mapping, as the SNP data of  
426 the other 6 accessions were not available. Gene enrichment close to significant  
427 SNPs located within +/-20 kb of the significant SNPs was quantified. TAIR 10 was  
428 used as the reference database (<http://www.arabidopsis.org/>).

429

#### 430 **Zinc concentration determination**

431 6-week-old plants were harvested, dried in 60°C for a week and milled. Around 0.1 g  
432 milled materials were digested with 2.5 ml 69 % HNO<sub>3</sub> and 2 ml 30% HCl for 1 hour.  
433 The samples were placed in a microwave at 170 °C for 25 minutes, followed by 200  
434 °C for 40 minutes. The extract was measured by atomic absorption spectrometry  
435 (Thermo Fisher Scientific, United Kingdom) to determine the tissue Zn concentration.

436

#### 437 **Quantitative RT-PCR analysis**

438 Plants were grown in +Zn and -Zn soil-sand mixes (described above) with 3-5  
439 replicates. For each replicate, 10-20 seedlings were harvested and pooled at around  
440 noon at 14 DAS (days after sowing, not yet bolting) with liquid nitrogen, before  
441 storing in -80°C. Total RNA of all seedlings was extracted with the innuPREP Plant  
442 RNA Kit (Analytik Jena, Germany) after plants were homogenized (Retsch,  
443 Germany). Around 1 µg total RNA was used to synthesize a cDNA library using the  
444 QuantiTect Reverse Transcription Kit (Qiagen, Germany). Gene-specific primers for  
445 qRT-PCR were designed according to the *Arabidopsis* genome sequence information

446 TAIR10 (<https://www.arabidopsis.org/>) and Primer-BLAST  
447 (<http://www.ncbi.nlm.nih.gov/tools/primer-blast/>), quality-checked by using PCR  
448 Primer Stats ([http://www.bioinformatics.org/sms2/pcr\\_primer\\_stats.html](http://www.bioinformatics.org/sms2/pcr_primer_stats.html)). Primers  
449 were ordered from Life Technologies (Darmstadt, Germany) and listed in the  
450 Supplemental Table S5. For the PCR procedure, 15 µl reaction mix was used,  
451 containing 6 µl 20x diluted cDNA, 7.5 µl SYBR Green Supermix (KAPA Biosystems,  
452 United States), 0.3 µl forward primers, 0.3 µl reverse primers and 0.9 µl RNase-free  
453 H<sub>2</sub>O. The reaction was conducted in 384-well plates in an RT-PCR system (Bio-Rad,  
454 München, Germany). The standard protocol was set as: 3 min at 95 °C, followed by  
455 44 cycles of 3 s at 95 °C and 25 s at 60 °C, and then 5 s at 65 °C for the melt curve.  
456 For all gene expression calculations, two reference genes, *SAND* (*AT2G28390*) and  
457 *PDF2* (*AT1G13320*), were used and data were normalized to the first replicate of +Zn.  
458 These two genes did not change their expression level between different Zn  
459 treatments. Reactions were performed in 3 technical replicates and 3-5 biological  
460 replicates. Relative transcript levels were calculated with the 2- $\Delta\Delta$ CT method by the  
461 Bio-Rad software (Livak and Schmittgen, 2001). All kits described here were used  
462 according to the manufacturer's instructions.

463

#### 464 **Histological analysis**

465 Palisade cell sizes were measured as previously described (Sicard et al., 2015).  
466 Briefly, first four leaves were harvested and fixed overnight at 4 °C in FAA solution  
467 (20 ml formalin, 10 ml acetic acid, 100 ml alcohol, and 70 ml water), and dehydrated  
468 through a series of 70, 80, 90, 100% ethonal, with 5-min incubation per step. Then  
469 the samples were transferred into acetone for 5-min incubation at 95 °C, and cleared  
470 overnight in the clearing solution (100 g chloral hydrate, 10 g glycerol, and 25 ml  
471 water). Finally the samples were stained with 10 µg ml<sup>-1</sup> propidium iodide for two  
472 days, and imaged with the confocal microscope (LSM700, Carl Zeiss, Germany).  
473 Four regions were measured for every leaf and cell size was averaged from four  
474 leaves. Three biological replicates were performed.

475

#### 476 **Statistical analysis**

477 Data analysis, graphs and statistics were done by using Microsoft Excel and R  
478 (<https://www.r-project.org/>). The significant differences of means for all traits in this



479 study were performed by t-test. Multiple comparisons were done using Tukey HSD  
480 method in R. Broad-sense heritability was calculated as genotypic variance divided  
481 by total variance (Visscher *et al.*, 2008). The total variance was partitioned into  
482 genetic variance and residuals.

483

484 **Supplemental data** are given online.

485

#### 486 **Author contributions**

487 X.C. and U.L. conceived the experiment; X.C. performed the experimental work; X.C.  
488 and U.L. analyzed data; X.C. and U.L. wrote the paper.

489

490 **Acknowledgments:** We thank Karl Schmid (Stuttgart, Germany) for all accessions  
491 seeds, Markus Schmid (Umea, Sweden) for mutant seeds, Dr Huaiyu Yang for initial  
492 help with lab work, Benjamin Neuhäuser for critical reading of the manuscript and  
493 Dominik Hedderich for help with determination of flowering times. We also thank the  
494 China Scholarship Council for support.

495

#### 496 **Competing interests**

497 The authors declare no competing financial interests.

## References

- Amasino R.** 2010. Seasonal and developmental timing of flowering. *Plant Journal* **61**, 1001-1013.
- Andres F, Coupland G.** 2012. The genetic basis of flowering responses to seasonal cues. *Nature Reviews Genetics* **13**, 627-639.
- Atwell S, Huang YS, Vilhjalmsson BJ, et al.** 2010. Genome-wide association study of 107 phenotypes in *Arabidopsis thaliana* inbred lines. *Nature* **465**, 627-631.
- Balasubramanian S, Sureshkumar S, Lempe J, Weigel D.** 2006. Potent induction of *Arabidopsis thaliana* flowering by elevated growth temperature. *PLoS Genetics* **2**, e106.
- Bogre L, Magyar Z, Lopez-Juez E.** 2008. New clues to organ size control in plants. *Genome Biology* **9**, 226.
- Bouche F, Lobet G, Tocquin P, Perilleux C.** 2016. FLOR-ID: an interactive database of flowering-time gene networks in *Arabidopsis thaliana*. *Nucleic Acids Research* **44**, D1167-D1171.
- Broadley MR, White PJ, Hammond JP, Zelko I, Lux A.** 2007. Zinc in plants. *New Phytology* **173**, 677-702.
- Cakmak I.** 2008. Enrichment of cereal grains with zinc: agronomic or genetic biofortification? *Plant and Soil* **302**, 1-17.
- Capovilla G, Schmid M, Pose D.** 2015. Control of flowering by ambient temperature. *Journal of Experimental Botany* **66**, 59-69.
- Castro Marin I, Loef I, Bartetzko L, Searle I, Coupland G, Stitt M, Osuna D.** 2011. Nitrate regulates floral induction in *Arabidopsis*, acting independently of light, gibberellin and autonomous pathways. *Planta* **233**, 539-552.
- Chasapis CT, Loutsidou AC, Spiliopoulou CA, Stefanidou ME.** 2012. Zinc and human health: an update. *Archives in Toxicology* **86**, 521-534.
- Chen X, Yuan L, Ludewig U.** 2016. Natural Genetic Variation of Seed Micronutrients of *Arabidopsis thaliana* Grown in Zinc-Deficient and Zinc-Amended Soil. *Frontiers in Plant Sciences* **7**, 1070.
- Corbesier L, Vincent C, Jang S, et al.** 2007. FT protein movement contributes to long-distance signaling in floral induction of *Arabidopsis*. *Science* **316**, 1030-1033.
- Gonzalez N, Vanhaeren H, Inze D.** 2012. Leaf size control: complex coordination of cell division and expansion. *Trends in Plant Sciences* **17**, 332-340.

- Jaeger KE, Wigge PA.** 2007. FT protein acts as a long-range signal in *Arabidopsis*. *Current Biology* **17**, 1050-1054.
- Kant S, Peng M, Rothstein SJ.** 2011. Genetic regulation by *NLA* and *microRNA827* for maintaining nitrate-dependent phosphate homeostasis in *Arabidopsis*. *PLoS Genetics* **7**, e1002021.
- Kolar J, Senkova J.** 2008. Reduction of mineral nutrient availability accelerates flowering of *Arabidopsis thaliana*. *Journal of Plant Physiology* **165**, 1601-1609.
- Lempe J, Balasubramanian S, Sureshkumar S, Singh A, Schmid M, Weigel D.** 2005. Diversity of flowering responses in wild *Arabidopsis thaliana* strains. *PLoS Genetics* **1**, 109-118.
- Livak KJ, Schmittgen TD.** 2001. Analysis of relative gene expression data using real-time quantitative PCR and the 2(-Delta Delta C(T)) Method. *Methods* **25**, 402-408.
- Marschner P.** 2011. Marschner's Mineral Nutrition of Higher Plants. *Academic Press, London*.
- Melzer S, Lens F, Gennen J, Vanneste S, Rohde A, Beeckman T.** 2008. Flowering-time genes modulate meristem determinacy and growth form in *Arabidopsis thaliana*. *Nature Genetics* **40**, 1489-1492.
- Notaguchi M, Abe M, Kimura T, et al.** 2008. Long-distance, graft-transmissible action of *Arabidopsis* FLOWERING LOCUS T protein to promote flowering. *Plant Cell Physiology* **49**, 1645-1658.
- Pose D, Verhage L, Ott F, Yant L, Mathieu J, Angenent GC, Immink RG, Schmid M.** 2013. Temperature-dependent regulation of flowering by antagonistic FLM variants. *Nature* **503**, 414-417.
- Powell AE, Lenhard M.** 2012. Control of organ size in plants. *Current Biology* **22**, R360-R367.
- Salome PA, Bomblies K, Laitinen RA, Yant L, Mott R, Weigel D.** 2011. Genetic architecture of flowering-time variation in *Arabidopsis thaliana*. *Genetics* **188**, 421-433.
- Salt DE, Baxter I, Lahner B.** 2008. Ionomics and the study of the plant ionome. *Annual Reviews in Plant Biology* **59**, 709-733.
- Segura V, Vilhjalmsjon BJ, Platt A, Korte A, Seren U, Long Q, Nordborg M.** 2012. An efficient multi-locus mixed-model approach for genome-wide association studies in structured populations. *Nature Genetics* **44**, 825-830.

**Shalit A, Rozman A, Goldshmidt A, Alvarez JP, Bowman JL, Eshed Y, Lifschitz E.** 2009. The flowering hormone florigen functions as a general systemic regulator of growth and termination. *Proceedings of the National Academy of Sciences U S A* **106**, 8392-8397.

**Sinclair SA, Kramer U.** 2012. The zinc homeostasis network of land plants. *Biochimica et Biophysica Acta* **1823**, 1553-1567.

**Stetter MG, Schmid K, Ludewig U.** 2015. Uncovering Genes and Ploidy Involved in the High Diversity in Root Hair Density, Length and Response to Local Scarce Phosphate in *Arabidopsis thaliana*. *PLoS One* **10**, e0120604.

**Talukdar S, Aarts MG.** 2007. *Arabidopsis thaliana* and *Thlaspi caerulescens* respond comparably to low zinc supply. *Plant and Soil* **306**, 85-94.

**Torti S, Fornara F, Vincent C, Andrés F, Nordström K, Göbel U, Knoll D, Schoof H, Coupland G.** 2012. Analysis of the *Arabidopsis* shoot meristem transcriptome during floral transition identifies distinct regulatory patterns and a leucine-rich repeat protein that promotes flowering. *Plant Cell* **24**, 444-462.

**Visscher PM, Hill WG, Wray NR.** 2008. Heritability in the genomics era--concepts and misconceptions. *Nature Reviews Genetics* **9**, 255-266.

**Wada KC, Yamada M, Shiraya T, Takeno K.** 2010. Salicylic acid and the flowering gene *FLOWERING LOCUS T* homolog are involved in poor-nutrition stress-induced flowering of *Pharbitis nil*. *Journal of Plant Physiology* **167**, 447-452.

**Wang WY, Xu J, Liu XJ, Yu Y, Ge Q.** 2012. Cadmium induces early flowering in *Arabidopsis*. *Biologia Plantarum* **56**, 117-120.

**Weigel D.** 2012. Natural variation in *Arabidopsis*: from molecular genetics to ecological genomics. *Plant Physiology* **158**, 2-22.

## Figures and legends

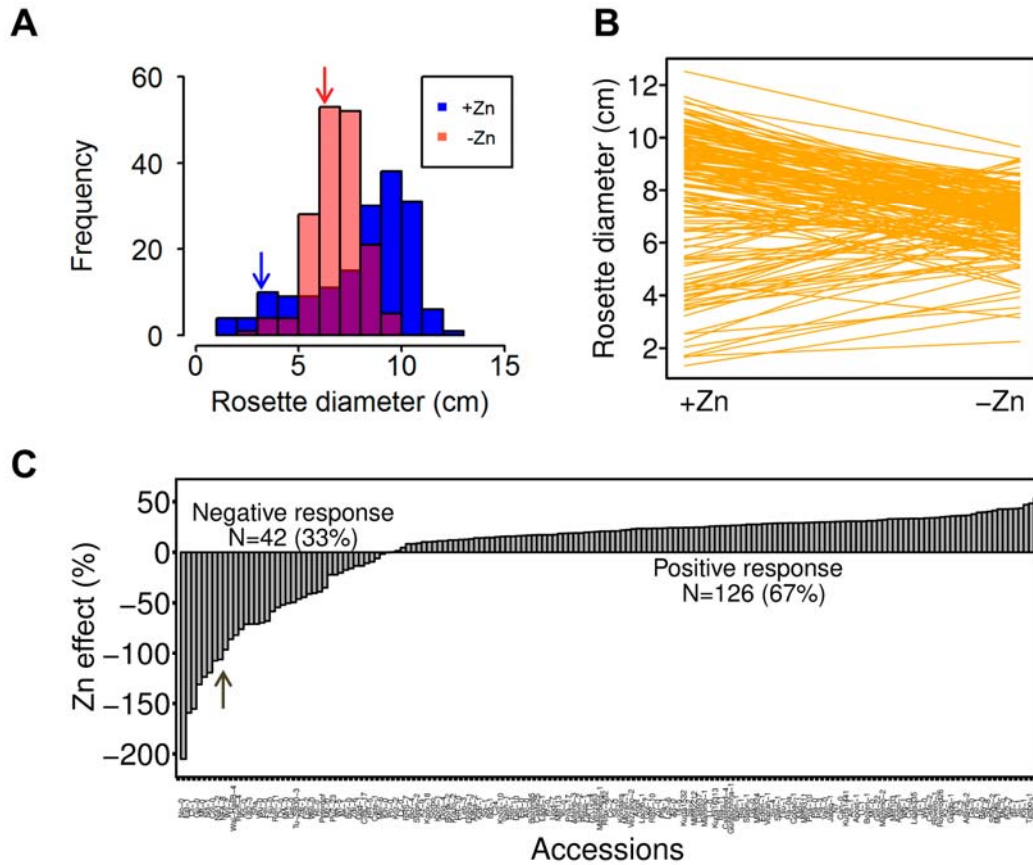

**Figure 1: Natural variation of rosette diameter and its response to Zn deficiency.** **A**, Distribution of rosette diameter for 168 accessions grown under control (+Zn) and Zn deficiency (-Zn) conditions. Data plotted are mean + SD, n=6. **B**, Reaction norms of rosette diameter in +Zn and -Zn. **C**, Natural variation of Zn effect. 168 accessions were divided into negative response and positive response. Arrows in **A** and **C** indicate the accession Col-0.

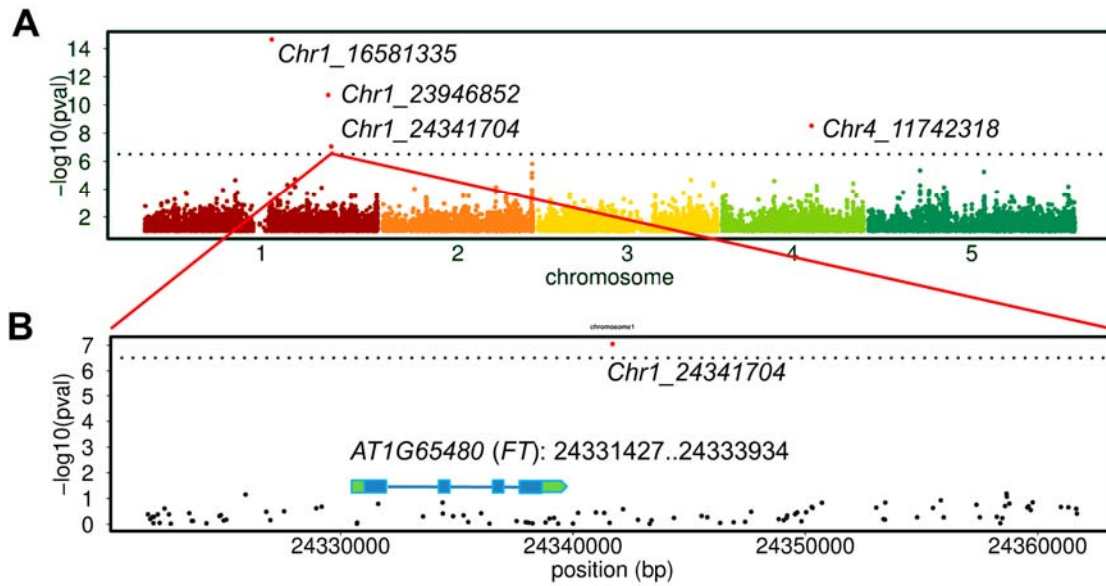

**Figure 2: Genome-wide association mapping of Zn effect. A**, Manhattan plot for Zn effect of rosette diameter. The 5% FDR threshold was denoted by a dashed line. Red dots indicate significant SNPs. **B**, +/- 20 kb windows fine map of significant SNP *Chr1\_24341704*, which located around 7.8 kb distance of *FT*.

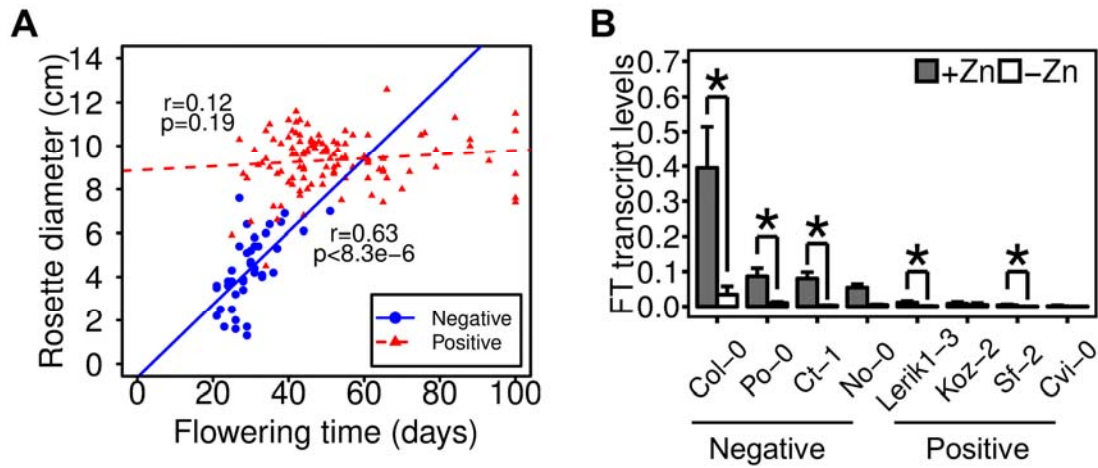

**Figure 3: Relationship of rosette diameter with flowering time and Zn. A,** Correlation between flowering time (+Zn) and rosette diameter in negative-response accessions and positive-response accessions. **B,** *FT* transcript levels in negative-response (Col-0, Po-0, Ct-1, No-1) and positive-response accessions (Lerik1-3, Koz-2, Sf-2, Cvi-0). Gene expression was referenced to *SAND* and *PDF2* genes. \* denotes the significant difference at  $p<0.05$  level.

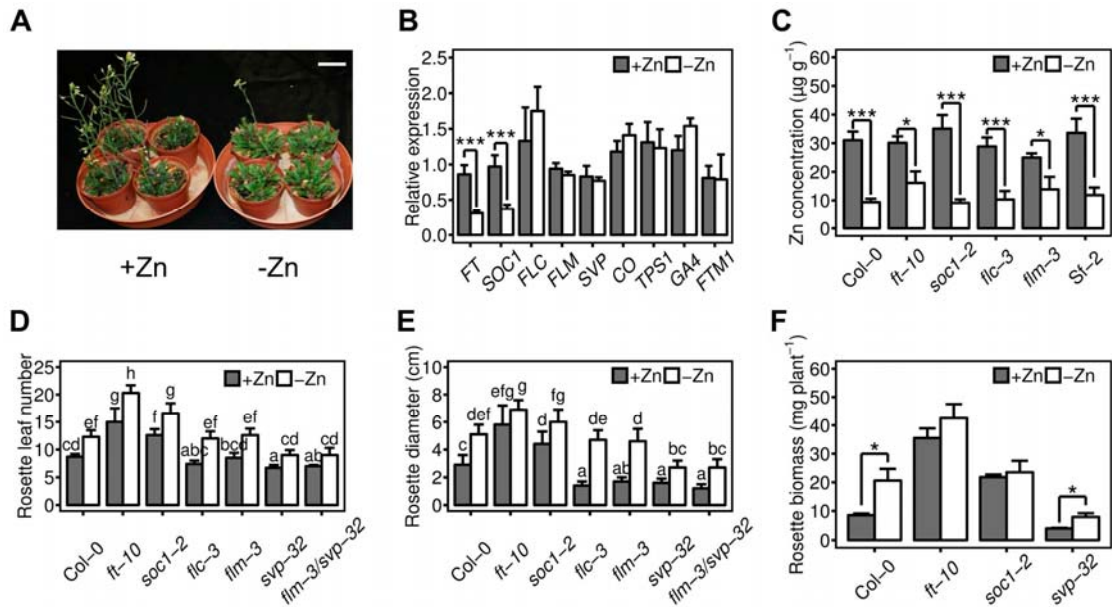

**Figure 4: Genetic basis of Zn regulation of flowering time and rosette diameter.**

**A**, Col-0 plants grown in +Zn and -Zn soils. Scale bar: 5cm. Note that -Zn delayed flowering. **B**, Relative expression level for central flowering genes in Col-0 plants at vegetative growth stage (14 DAS). Replicated data were normalized to reference genes *SAND* and *PDF2*. **C**, Shoot Zn concentrations in -Zn and +Zn conditions. **D**, Rosette leaf number and **E**, rosette diameter, at bolting stage in wild-type (Col-0) and flowering null mutants in Col-0 background. **F**, vegetative biomass in Col-0 and mutants, \*\*\* denote  $p < 0.001$ . Different small letters between columns denote significant difference at  $p < 0.05$  level. Data plotted are mean + SD.



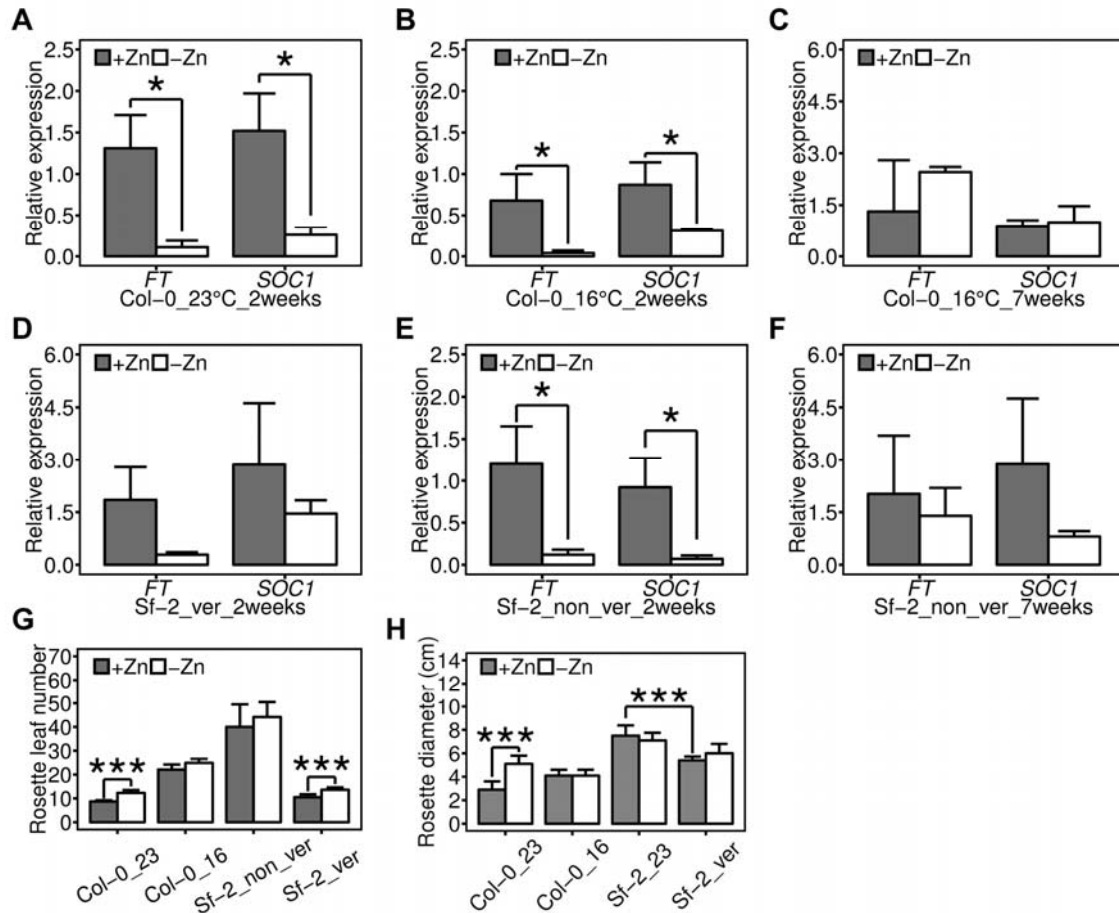

**Figure 5: Low temperature and vernalization affect the Zn-dependence of flowering in natural accessions. A-C,** Relative *FT* and *SOC1* expression levels of Col-0 grown at 23 and 16 °C. **D-F,** Relative *FT* and *SOC1* expression levels of Sf-2 grown with and without vernalization process. Vernalization indicates the process of 3-weeks cold treatment before normal growth. **G,** Rosette leaf number and **H,** rosette diameter of Col-0 and Sf-2 at bolting stage. “ver” means vernalization. \* and \*\*\* denote  $p < 0.05$  and  $p < 0.001$ , respectively. Data plotted are mean + SD.

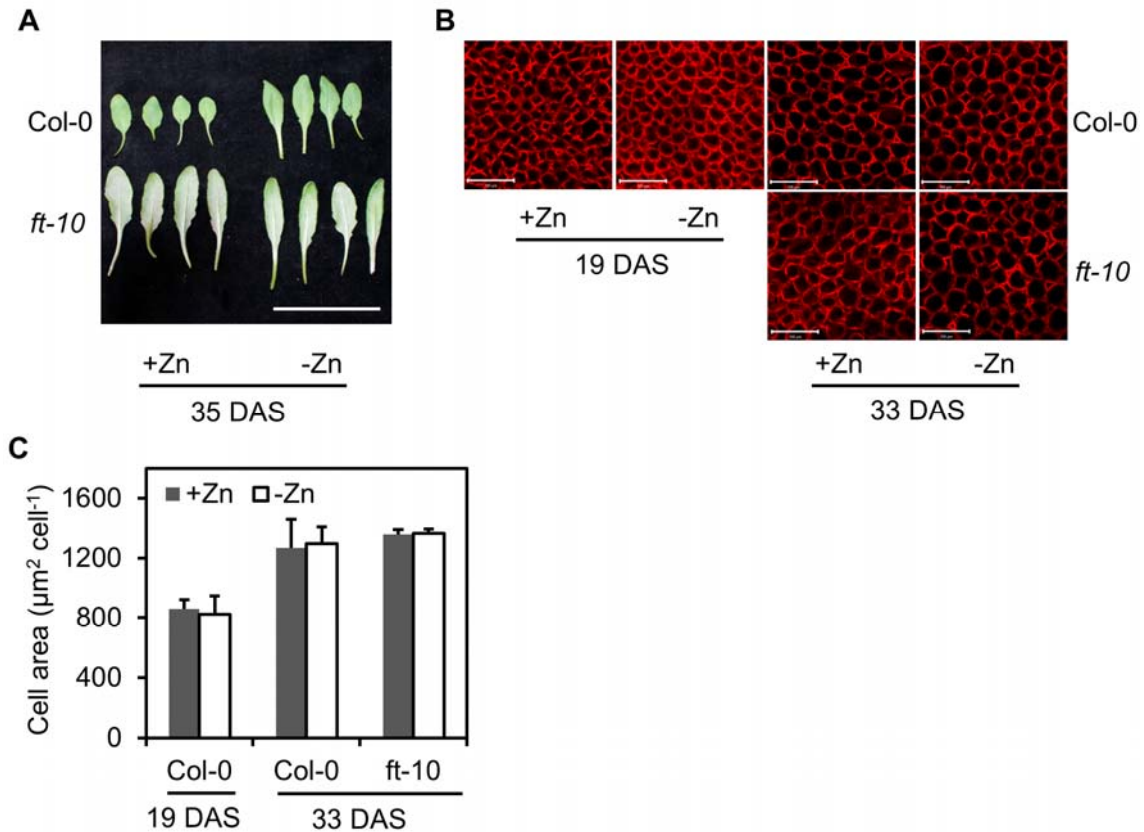

**Figure 6: Quantification of cell number in leaves.** **A**, First four leaves at 35 DAS (days after sowing). Scale bar: 5cm. **B**, Confocal mesophyll cell images after staining with propidium iodide of wild type and *ft-10*. Scale bar: 100  $\mu\text{m}$ . **C**, Average cell size of first four wild type and *ft-10* leaves at 19 DAS and 33 DAS. Note that plants have not flowered at 19 DAS and thus used as the background, and plants finished flowering at 33 DAS. Data plotted are mean + SD.

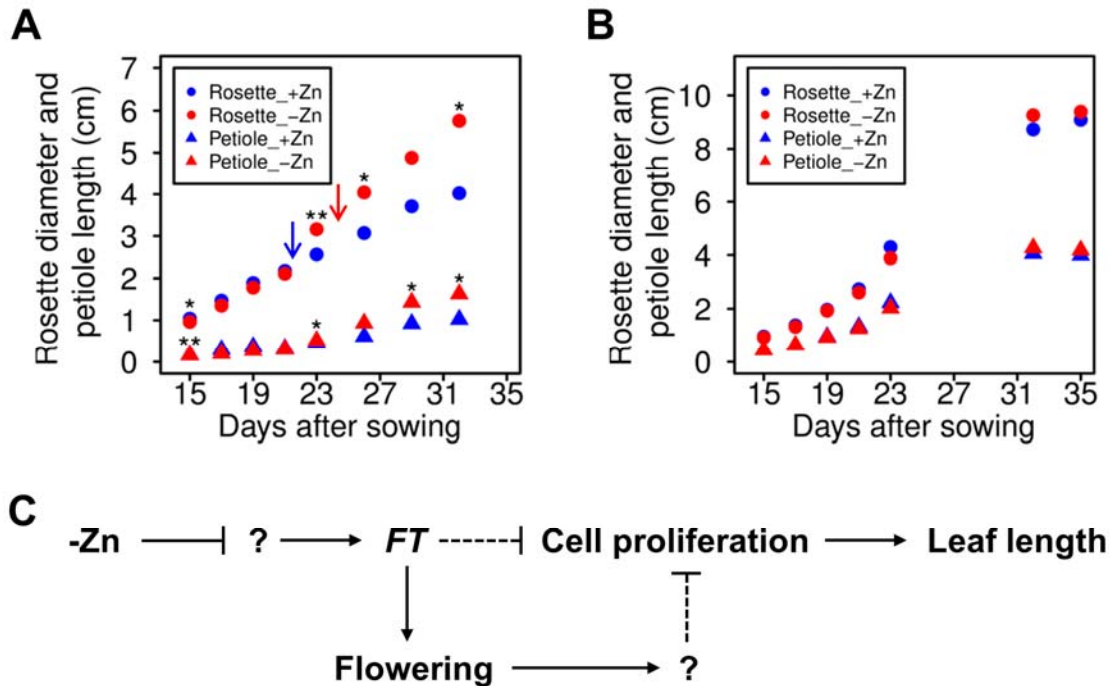

**Figure 7: Zn regulation of flowering time and leaf length.** **A**, Growth curve of rosette diameter (circle) and petiole size (triangle) in Col-0 under +Zn (blue) and -Zn (red) conditions. \* and \*\* denote  $p < 0.05$  and  $p < 0.01$ . Arrows indicate the flowering time in +Zn (blue) and -Zn (red). **B**, Growth curve of *ft-10*. **C**, Working model of Zn regulation of flowering time and leaf length in early-flowering *Arabidopsis*. Arrows and block lines denote activation and repression, respectively. Dashed lines indicate putative regulation.

## **Supplementary Data:**

**Supplementary Figure S1:** The worldwide population distribution of 168 *Arabidopsis* accessions used in this study. Every red dot represents one accession.

**Supplementary Figure S2:** Relationship between rosette diameter in +Zn, -Zn and Zn effect.

**Supplementary Figure S3:** QQ-plot of GWA mapping for Zn effect.

**Supplementary Figure S4: SNP evaluation of the GWAS for Zn sensitivity. A** and **B**, Zn sensitivity of allele adenine (A) and allele guanine (G). **C**, LD values ( $r^2$ ) between identified SNP (*1G\_24327565*) and *FT* (*AT1G65480*, *Chr1:24331428..24333934*). Two SNPs located in the gene body of *FT* were also presented.  $r^2$  was 0.491 between *1G\_24327565* and *1G\_24333548*.  $r^2$  lower than 0.3 was colored with blue.

**Supplementary Figure S5:** *SOC1* transcript levels in negative-response (Col-0, Po-0, Ct-1, No-1) and positive-response accessions (Lerik1-3, Koz-2, Sf-2, Cvi-0). Data were referenced to reference genes *SAND* and *PDF2*. Values were mean + SD. \* denotes  $p < 0.05$ .

**Supplementary Figure S6:** Relative expression levels of typical Zn deficiency-responsive genes in Col-0 and Sf-2 leaves.

**Supplementary Table S1:** List of all accessions used in this study.

**Supplementary Table S2:** Summary of rosette diameter in +Zn and -Zn.

**Supplementary Table S3:** One-way ANOVA of rosette diameter in +Zn and -Zn.

**Supplementary Table S4: Significant SNPs identified in GWA and enriched genes located +/- 20 kb of the SNPs.**

**Supplementary Table S5: List of primers used in qRT-PCR.**
